## RESEARCH ARTICLE

# Determinants of knowledge, attitudes, and practices in relation to HIV/AIDS and other STIs among people with disabilities in North-Shewa zone, Ethiopia

Alemayehu Gonie Mekonnen<sup>1</sup>\*, Alebachew Demelash Bayleyegn<sup>1</sup>, Yared Asmare Aynalem<sup>1</sup>, Tigist Demssew Adane<sup>1</sup>, Mikyas Arega Muluneh<sup>2</sup>, Abayneh Birlie Zeru<sup>3</sup>

**1** Department of Nursing, College of Health Science, Debre Berhan University, Debre Berhan, Amhara Regional State, Ethiopia, **2** Department of Midwifery, College of Health Science, Debre Berhan University, Debre Berhan, Amhara Regional State, Ethiopia, **3** Department of Public Health, College of Health Sciences, Debre Berhan University, Debre Berhan, Amhara Regional State, Ethiopia

\* These authors contributed equally to this work.

\* [alemayehugonie19@gmail.com](mailto:alemayehugonie19@gmail.com)

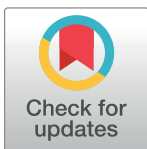

## OPEN ACCESS

**Citation:** Mekonnen AG, Bayleyegn AD, Aynalem YA, Adane TD, Muluneh MA, Zeru AB (2020) Determinants of knowledge, attitudes, and practices in relation to HIV/AIDS and other STIs among people with disabilities in North-Shewa zone, Ethiopia. PLoS ONE 15(10): e0241312. <https://doi.org/10.1371/journal.pone.0241312>

**Editor:** Zixin Wang, The Chinese University of Hong Kong, HONG KONG

**Received:** March 24, 2020

**Accepted:** October 13, 2020

**Published:** October 27, 2020

**Copyright:** This is an open access article, free of all copyright, and may be freely reproduced, distributed, transmitted, modified, built upon, or otherwise used by anyone for any lawful purpose. The work is made available under the [Creative Commons CC0](https://creativecommons.org/licenses/by/4.0/) public domain dedication.

**Data Availability Statement:** The data underlying the results contain the potential identification of our study participants and have some ethical restrictions as set by the ethical review committee of Debre Berhan University. However, the raw datasets will be available from the chairman of ethics committee of college of health science, Debre Berhan University on a reasonable request ([hilinak@dbu.edu.et](mailto:hilinak@dbu.edu.et)).

## Abstract

### Introduction

People with disabilities face socioeconomic disadvantages and they have limited access to sexual and reproductive health information. They are highly vulnerable to sexual abuse which places them at increased risk of HIV and STI infection. At present, however, little is known about the knowledge, attitude and practice of sexually transmitted diseases including HIV/AIDS and other STIs in Ethiopia. This study aimed to identify which individual factors best predict knowledge, attitudes, and practices in relation to HIV/AIDS and other STIs among people with disabilities in North-shewa zone, Ethiopia.

### Methods

A cross-sectional study was conducted from June to October 2019. A total of 397 respondents were interviewed using a structured and pre-tested questionnaire. A systematic sampling technique was employed to select the respondents. Logistic regression was performed to analyze the data. A significant association was declared at a p-value of less than 0.05.

### Results

Nearly half of the study participants were knowledgeable in relation to HIV/AIDS (47.3%) and STIs (46.9%). Sixty-two percent of respondents had good attitude towards evidence of HIV/AIDS while sixty-nine percent of participants had good attitude towards helpful facts of STIs. Twenty-three percent of study participants had been ever tested for HIV infections. Being married (AOR = 2.23; 95% CI = 1.92, 10.72) was associated with having good knowledge of STI. Males were 1.6 times more knowledgeable about HIV/AIDS than females (AOR = 1.60; 95% CI = 1.21, 9.12).

**Funding:** The financial grants to carry out this study was obtained from Debre Berhan University, Ethiopia. The funding university does not have any role in the design of the study, data collection, analysis and interpretation of data, and in writing the manuscript.

**Competing interests:** The authors have declared that no competing interests exist.

**Abbreviations:** AIDS, Acquired Immune Deficiency Syndrome; AOR, Adjusted Odds Ratio; CI, Confidence Interval; COR, Crude Odds Ratio; HIV, Human Immune Virus; SPSS, Statistical Package for the Social Sciences; PWDs, People With Disabilities; SRH, Sexual and Reproductive Health; STIs, Sexually Transmitted Infections.

## Conclusions

In this study, knowledge, attitudes, and practices of people with disabilities in relation to HIV/AIDS and other STIs were relatively low. This is clear evidence that HIV programs need to ensure that people with disabilities can access basic knowledge about HIV/AIDS and STIs.

## Introduction

Globally, more than one billion people (15% of the world's population) live with a disability. Four out of five people with disabilities (PWDs) live in developing countries [1]. In Ethiopia, more than 15 million PWDs live with physical, sensory (hearing and visual loss), intellectual disabilities, or a combination of these disabilities [2]. The incidence of disabilities has been increasing due to accidents and the increase in chronic health conditions including HIV [3, 4].

Human immune virus (HIV) and other sexually transmitted infections (STIs) and disability are linked in several ways [5]. Although HIV-related data on PWDs are limited, growing evidence suggests PWDs are more likely to encounter factors that put them at higher risk of HIV and other STI infection than people without disabilities [6]. Persistent discrimination against and exclusion of PWDs increase their vulnerability of HIV infections [7]. Furthermore, there is a misconception that PWDs are sexually inactive and they are frequently overlooked in HIV prevention and AIDS (acquired immune deficiency syndrome) programs [3, 5]. They are highly vulnerable to sexual abuse and experience social marginalization, which places PWDs at increased risk of HIV and STI infection [7, 8].

Although people with disabilities require the same HIV/AIDS information, services and supports as all other members of society, they are excluded and neglected in all of the sectors responding to HIV and STI infections [3]. Remarkably, they are notably absent from equitable access and are often treated as a low priority for those services [8, 9]. This access is hindered by several factors such as stigma and discrimination based on their disability status and/or type of disability. Healthcare services are often not physically accessible and lack sign language interpreters and other information formats such as Braille, audio, or plain language which can provide advice on HIV-related issues including sexually transmitted disease [4, 10, 11]. As a result of these factors, PWDs have inefficient information about the prevention and transmission of STIs [12] and they were more likely to describe incorrect modes of HIV transmission and prevention [13].

There is a growing body of literature that recognizes a variety of issues that affect knowledge, attitudes, and practices in relation to HIV/AIDS and other STIs among people with disabilities. For example, a literature review from developing countries [10] and a research from Uganda [9] suggested that PWDs have very limited knowledge about HIV and other STIs because they are frequently excluded from access to HIV/AIDS and reproductive health information because of their disability status. Sociodemographic characteristics such as type of disability marital and educational level were also reported as potential predictors of knowledge and practices of PWDs in relation to HIV/AIDS because PWDs' interest in seeking SRH-related services and information may be affected by these variables [5, 11].

HIV/AIDS is now the leading cause of morbidity and mortality among adults in Ethiopia. The overall prevalence of HIV in Ethiopia was found to be 0.9 and 72, 2248 of adults were infected with HIV in 2017 [14]. To best of the researchers' knowledge, there is also no official statistics exist on HIV prevalence among PWDs, which creates a challenge for understanding the extent of the pandemic in this population. Moreover, lack of attention to HIV/AIDS among PWDs is prominent and continuing. People with disabilities in Ethiopia have limited

access to sexual and reproductive health information including HIV/AIDS and other STIs [4] and have an increased risk of HIV/AIDS and other STIs-related problems. They often lack knowledge of HIV/AIDS and other STIs [4, 15]. Lack of access to sexual and reproductive health information, in turn, make PWDs highly vulnerable to different types of SRH-related problems like STI/HIV, unwanted pregnancy, or unsafe abortion [16, 17].

At present, however, little is known about the knowledge, attitudes and practices of sexually transmitted diseases including HIV/AIDS and other STIs, and there is inadequate data on the sexual and reproductive health needs of PWDs in Ethiopia. The aim of this study was, therefore, to identify which individual factors best predict knowledge, attitudes, and practices in relation to HIV/AIDS and other STIs among a sample of PWDs in North-shewa zone, Ethiopia. An examination of the knowledge, attitudes, and practices regarding sexually transmitted diseases such as HIV/AIDS and STIs are the cornerstones to combat these diseases. Besides, evidence-based data on the sexual and reproductive health needs of PWDs make their needs visible for policymaking and program designing to protect them from infections.

## Methods

### Study setting and period

A cross-sectional survey was conducted from June to October 2019 in the North-shewa zone, Amhara regional state, Ethiopia. The Debre Berhan town (the zone city) is located 130 kilometers far from Addis Ababa (the capital city of Ethiopia). The zone has 10 functional disability-support organizations: one is found in Debre Berhan town and nine are found in the other nine districts of the zone. The rest 15 districts have no functional disability support-organization. Overall, these disability-support organizations comprised a total number of 1500 PWDs. These organizations support all PWDs (physically handicapped, hearing loss, partial mental illness, visual loss, multiple impairments). These disabled people's organization provide advocacy service, provide life skill training and support to live in the community, get involved in work (*unpublished zonal health department report, 2019*).

### Participants and sampling procedures

All the reproductive-age groups of PWDs who enrolled in the disability-support organizations in North-shewa zone were the study participants. Those who were critically ill due to medical problem at the time of study and unable to communicate and respond to questionnaires were excluded from the study. People with dual disabilities such as unable to see plus unable to hear were also excluded from the study.

The sample size was calculated using a single population proportion formula. The assumptions were: the proportion of PWDs who had reproductive health knowledge was 79.6% ( $p = 0.796$ ) [16], with 95% confidence interval (CI) to be 1.96, and margin of error to be 5%. With the above assumptions, the single population formula yields 250. Considering a design effect of 1.5, ( $250 \times 1.5 = 375$ ) and adding a non-response rate of 10% ( $375 + 37 = 412$ ), a total sample size of 412 respondents were selected.

Of ten disability-support organizations, five of them were selected by lottery method. The disability-support organizations have registry which contains lists of people with disabilities. Each registry contained, on average, 320 PWDs and about 120 females were registered in each organization. The registry contained contact addresses of the participants and it was used as the sampling frame in this study. Then, we employed probability proportional to size to recruit 412 participants. From each disabled people's organization, every four study participants were selected from the list of the registry (using a systematic random sampling technique) which gave nearly equal number of respondents to each organization.

## Data collection

A pre-tested questionnaire was used to collect the data. The structured questionnaire was designed in English then translated into Amharic (native language) and back into English to ensure consistency. A revision was made for some of the questions after the pretest. The data were collected by trained enumerators through a face-to-face interview. Five data collectors and five supervisors participated in the study. One of the data collectors was a certified sign language interpreter who could collect data from participants who have a hearing loss. Data completeness were checked by the investigators and supervisors.

**Measurements.** Most of the questioners were taken from the 2016 Ethiopian demographic health survey [18] and from peer-reviewed literature [10, 15, 19–21]. The questions comprised the following sections; socio-demographic characteristics and questions which examined the respondents' knowledge, attitudes, and practices of HIV/AIDS and other STIs.

Knowledge questions in relation to HIV/AIDS were: What are the ways of HIV transmission? What are the ways of HIV prevention? Respondents answered either "Yes" or "No" or "Do not know" from the listed options. Based on these questions, mean scores of knowledge about HIV/AIDS were calculated to classify the respondents into two groups (knowledgeable and not knowledgeable). Respondents who answered "Yes" were considered as correctly answered and those who answered "No" and "I do not know" were considered as not answered correctly. The mean score of knowledge about HIV/AIDS was computed by adding up the score of correct response from the listed options. Respondents who scored the mean and above the mean score of correctly answered questions were classified as knowledgeable, less than the mean score of correct answers were classified as not knowledgeable towards facts in relation to HIV/AIDS.

Knowledge questions about STIs were: what is STIs? Which type of STIs did you know? Which signs/symptoms of STIs did you know? Which are the prevention methods of STIs? What are the complications of untreated STIs? Then, respondents answered either "Yes" or "No" or "Do not know" from the listed options. Similarly, the mean scores of knowledge about STIs were calculated from the listed options to classify the respondents into two groups (knowledgeable and not knowledgeable). Respondents who scored the mean and above the mean score of the correctly answered questions were classified as knowledgeable, less than the mean score of correct answers were classified as not knowledgeable about STIs.

The attitudes of respondents towards facts in relation to HIV/AIDS and other STIs were assessed with eleven and eight attitudinal questions, respectively. All attitudinal statements were three-point Likert-scale items (1 = yes (agree), 2 = no (disagree), 3 = do not know) and stated positively. The respondents could choose one of the three possible response categories. The respondents' attitude was computed by adding up the score of correct response form attitudinal statements. Respondents who scored the mean and above the mean score of the correctly answered questions were classified as having a good attitude towards facts in relation to HIV/AIDS and other STIs. Cronbach's alpha was computed to determine the internal reliability of the attitudinal aspects of questions towards facts of HIV/AIDS and STIs. The reliability scores are presented in Table 1.

The mean score of the respondents' attitude towards facts of HIV/AIDS was computed from these eleven attitudinal questions, and the mean score of the respondents' attitude towards STIs was computed from eight attitudinal questions. Respondents who scored the

**Table 1. Reliability score of attitudinal aspects of questions towards HIV/AIDS and STIs scale.**

| Scale                                             | Cronbach's alpha value |
|---------------------------------------------------|------------------------|
| Attitudinal aspects of questions towards HIV/AIDS | 0.765                  |
| Attitudinal aspects of questions towards STIs     | 0.819                  |

<https://doi.org/10.1371/journal.pone.0241312.t001>

mean and above the mean score of attitudinal statements were considered as having a good attitude and less than the mean score as a poor attitude for both HIV/AIDS and STIs. Concerning HIV testing practice, it was computed by calculating the percentage of PWDs who had been ever tested for HIV infections.

### Data analysis

Data were checked for completeness and inconsistencies. Epi-data version 3.1 was used for data entry and data were exported to SPSS version 21. Descriptive statistics were computed. Logistic regression was performed to analyze the data. Those independent variables which were statistically significant in the bivariate model ( $p\text{-value} < 0.05$ ) were entered into the multivariable analysis. In the final model, a significant association was declared at a  $p$ -value of less than 0.05. The results were presented in texts and tables with adjusted odds ratio (AOR) and the corresponding 95% CI.

### Ethical considerations

Ethical approval was obtained from the research and an ethical review committee of Debre Berhan University. Written informed consent was obtained from each respondent. All the information obtained from the study participants were kept confidential throughout the process of study, and the name of the respondent was replaced by code. Withdrawal from the study at any point if they wished was assured.

## Results

### Socio-demographic characteristics

A total of 397 respondents were interviewed with a response rate of 96.4%. The mean age of the respondents was 27.7( $\pm 7.1$ SD) years. Fifty-six percent of respondents were female and 48.1% of participants were single. The highest number of study participants were Orthodox Christians (93.0%). Regarding the educational level of the respondents, 48% of respondents completed primary education (Table 2).

### Knowledge and practice of respondents regarding HIV/AIDS

Ninety-eight percent of respondents had ever heard about HIV/AIDS whereas three-fourth of them had ever heard about VCT (voluntary counselling and testing). Forty-two percent of the respondents knew HIV transmissions and 57.1% of respondents knew HIV prevention methods. Remaining faithful to partner was the most reported ways of HIV prevention methods (90.5%). Overall, 47% of respondents were knowledgeable in relation to HIV/AIDS (95% CI 41.3, 54.6). Regarding practice of HIV testing, only 23% of respondents had been ever tested for HIV infection (95% CI 11.9, 34.8) (Table 3).

### Attitude of respondents towards HIV/AIDS

The respondents' attitude towards facts of HIV/AIDS was computed from eleven attitudinal statements. Thus, 62.7% of the respondents were above the mean score and they were considered as having a good attitude towards evidence of HIV/AIDS (95% CI 54.9, 71.6) (Table 4).

### Knowledge of participants about STIs

As indicated in Table 5, 93% of respondents had ever heard about STIs. The knowledge of STIs types and major signs/symptoms of STIs was 44.9% and 37.6%, respectively. Likewise, the

**Table 2. Sociodemographic characteristics of respondents in North-shewa zone, Ethiopia, 2019.**

| Socio-demographic characteristics (N = 397) | Categories             | N (%)     |
|---------------------------------------------|------------------------|-----------|
| Form of disability of respondents           | Partial mental illness | 13(3.3)   |
|                                             | Hearing loss           | 57(14.4)  |
|                                             | Visual loss            | 94(23.7)  |
|                                             | Impaired mobility      | 197(45.2) |
|                                             | Multiple disabilities  | 53(13.3)  |
| Age                                         | 18–30                  | 271(68.1) |
|                                             | 31–40                  | 47(11.9)  |
|                                             | 41–50                  | 79(20.0)  |
| Sex                                         | Female                 | 173(43.7) |
|                                             | Male                   | 224(56.3) |
| Marital status                              | Married                | 142(35.9) |
|                                             | Single                 | 191(48.1) |
|                                             | Divorced/widowed       | 64(15.9)  |
| Religion                                    | Orthodox               | 369(93.0) |
|                                             | Muslim                 | 19(4.8)   |
|                                             | Protestant/Catholic    | 9(2.3)    |
| Educational status                          | No education           | 94(23.7)  |
|                                             | Primary education      | 194(48.9) |
|                                             | Secondary education    | 52(13.0)  |
|                                             | College education      | 57(14.4)  |
| Work status                                 | Had no job             | 163(41.1) |
|                                             | Student                | 63(15.9)  |
|                                             | Employed               | 57(14.4)  |
|                                             | Lottery seller         | 41(10.3)  |
|                                             | Others(beggar, tailor) | 73(18.3)  |
| Living condition                            | With parents           | 105(26.3) |
|                                             | With relatives         | 21(5.2)   |
|                                             | With friends/peers     | 124(31.4) |
|                                             | With partner           | 93(23.5)  |
|                                             | Alone                  | 54(13.6)  |

<https://doi.org/10.1371/journal.pone.0241312.t002>

respondents' knowledge of STIs transmission and prevention mechanisms was 44.5% and 59.7%, respectively. Overall, 46% of respondents had inclusive knowledge about STIs (95% CI 39.6, 50.1) (Table 5).

### Attitude of participants towards STIs

As demonstrated in Table 6, the respondent's attitude on STIs was computed by adding up the score of correct response form eight attitudinal statements. Accordingly, 96% respondents were above the mean score and they were considered as having a good attitude towards helpful facts and preventive methods of STIs (95% CI 62.9, 74.8) (Table 6).

### Determinants of knowledge about HIV/AIDS and other STIs

In the bivariate model, the sex of the respondents and previous information about VCT were statistically significant with knowledge of HIV/AIDS. In the same model, age and marital status of the respondents were also associated with their knowledge of STIs. Those variables which had a significant association in the bivariate model were entered into multiple logistic

**Table 3. The respondents' knowledge of HIV/AIDS in North-shewa zone, Ethiopia, 2019.**

| Variables                                               | Yes                  | No                       |
|---------------------------------------------------------|----------------------|--------------------------|
| Have you ever heard about HIV/AIDS?                     | 389(98.1)            | 8(1.9)                   |
| <b>What are the ways of HIV transmission? (n = 389)</b> |                      |                          |
| Unsafe sexual intercourse                               | 368(94.7)            | 28(5.3)                  |
| Sharing needles and syringes                            | 319(82.1)            | 78(17.8)                 |
| Blood transfusion                                       | 301(77.4)            | 96(22.6)                 |
| During pregnancy                                        | 260(66.9)            | 137(35.1)                |
| During childbirth                                       | 231(59.3)            | 166(40.7)                |
| Through breast milk                                     | 181(46.4)            | 216(55.6)                |
| Through mosquito and another insect bite                | 72(18.6)             | 325(81.4)                |
| Casual contact with a person (handshaking...)           | 18(4.6)              | 379(95.4)                |
| <b>Average knowledge of HIV transmissions</b>           | <b>164(42.2)</b>     | <b>233(57.8)</b>         |
| <b>What are the ways of HIV prevention? (n = 389)</b>   |                      |                          |
| Abstain from sexual intercourse                         | 286(73.5)            | 111(26.5)                |
| Use a condom during sexual intercourse                  | 284(73.0)            | 113(27.0)                |
| Remain faithful to a partner                            | 352(90.5)            | 45(9.5)                  |
| Avoid contaminated sharp objects                        | 228(58.6)            | 169(41.4)                |
| Avoid unsafe injections                                 | 133(34.2)            | 264(65.8)                |
| Avoid sex with sex workers                              | 154(39.5)            | 243(60.5)                |
| <b>Average knowledge of HIV preventions</b>             | <b>222(57.1)</b>     | <b>175(42.9)</b>         |
| Have you ever heard about VCT?                          | 294(75.7)            | 103(24.3)                |
| Have you ever tested for HIV?                           | 90(23.2)             | 307(76.8)                |
| <b>Overall HIV knowledge level</b>                      | <b>Knowledgeable</b> | <b>Not knowledgeable</b> |
|                                                         | <b>184(47.3)</b>     | <b>205(52.7)</b>         |

<https://doi.org/10.1371/journal.pone.0241312.t003>

regression analyses. The results of the analysis showed that male respondents were 1.6 times more likely to have good knowledge of HIV/AIDS than females (AOR = 1.60; 95% CI = 1.21, 9.12). Likewise, married respondents were two times more likely to have good knowledge of STIs than single (AOR = 2.23; 95% CI = 1.92, 10.72) (Table 7).

## Discussions

This study highlighted interesting insights into the knowledge, attitudes and practices of HIV and other STIs among PWDs in North-shewa zone, Ethiopia, unfortunately, there is inadequate data on the sexual and reproductive health status of people with disabilities. As underscored by the findings of this study, our results bring us how sexual health information and services are delivered among these population groups. In this study, nearly half of the respondents were knowledgeable in relation to HIV/AIDS and other STIs. However, this figure is lower than the study conducted in Ghana [17] and Hawassa city, Ethiopia [11]. The possible explanation could be the difference in access to healthcare services and information and the attention given to the sexual health of PWDs by the local health departments. Our finding suggest that there is indeed lack of sexual health information and services in the study area and thus SRH-related programs need to ensure PWDs can access basic knowledge about HIV/AIDS and other STIs.

Additionally, 37.6% of our study participants knew the major signs/symptoms of STIs which was slightly higher than a study conducted in Ifakara, Tanzania where 32.7% of study participants were able to mention only one sign/symptoms of STIs [22]. This could be noteworthy that PWDs have restricted access to sexual and reproductive health services including

**Table 4. The respondents' attitude towards HIV/AIDS in North-shewa zone, Ethiopia, 2019.**

| Variables (n = 389)                                                                                            | Agree                | Disagree             | Do not know |
|----------------------------------------------------------------------------------------------------------------|----------------------|----------------------|-------------|
| Do you think a person can get HIV for the first time he or she has sex?                                        | 256(65.9)            | 58(14.8)             | 75(19.3)    |
| Do you think, by looking carefully, one can know if someone has HIV?                                           | 66(17.0)             | 248<br>(63.7)        | 75(19.3)    |
| Do you think HIV/AIDS is severed and more affects youth?                                                       | 292(75.2)            | 61(15.6)             | 36(9.3)     |
| Do you think premarital sex for youths is not supported?                                                       | 245(63.0)            | 98(25.2)             | 46(11.9)    |
| Do you think AIDS patients should be isolated for the safety of others?                                        | 53(13.7)             | 291<br>(74.8)        | 44(11.5)    |
| Do you think discussing condoms or contraceptives with young people promote promiscuity?                       | 96(24.8)             | 235<br>(60.4)        | 58(14.8)    |
| Do you think that using a condom is a sign of not trusting a partner?                                          | 168(43.3)            | 172<br>(44.1)        | 49(12.6)    |
| Wife has a right to refuse unprotected sex with her husband if she wants to use a condom and if a husband not? | 225(57.8)            | 95(24.4)             | 69(17.8)    |
| Do you think a person having multiple sex partners has a high risk of acquiring HIV?                           | 316(81.1)            | 27(7.0)              | 46(11.9)    |
| Do you think HIV infected person can live longer if she or he is taking antiretroviral treatment?              | 288(74.1)            | 62(15.9)             | 39(10.0)    |
| Do you think eating healthy foods can keep a person from getting HIV?                                          | 79(20.4)             | 255<br>(65.6)        | 55(14.0)    |
| <b>The overall attitude of HIV/AIDS</b>                                                                        | <b>Good attitude</b> | <b>Poor attitude</b> |             |
|                                                                                                                | <b>244(62.7)</b>     | <b>145(37.3)</b>     |             |

<https://doi.org/10.1371/journal.pone.0241312.t004>

sexually transmitted infections, and they are often socially isolated in obtaining those services. It could also be explained that PWDs might have different interests in seeking STIs-related services and information.

As demonstrated in the results of this study, 62% of our respondents had favorable attitude towards facts of HIV/AIDS while 69% of respondents had good attitude towards helpful facts and preventive methods of STIs. This finding is consistent with previous research conducted in Hawassa city, Ethiopia [11] and in Zambia [23]. It is interesting to note that the attitude of participants may be influenced by the social determinants of HIV/AIDS and other STIs. Concerning the practice of HIV testing, only 23.2% of participants have ever been tested for HIV infections. In line with our finding, PWDs were less likely to be tested for HIV in Cameroon [3] and Uganda [24]. Similarly, as reported by previous research, families of PWDs may not encourage them to get HIV services [17, 23, 25]. The finding is more important in Ethiopia because stigma and social discrimination among PWDs exist in different aspects and social and cultural norms favour toward non-disabled people. Besides, these population groups are discouraged from HIV services as a result of negative conventions of health workers that they are not sexually active [5].

As demonstrated in the multivariate analysis, age, educational status, work status, living condition of the study participants did not have significant associations with the knowledge, attitudes and practices of HIV and other STIs. This indicates that knowledge, attitudes, and practices of PWDs in relation to HIV/AIDS and other STIs are not be affected by these variables. However, our result showed that married PWDs were two times more likely to have good knowledge of STIs than being single. In agreement with our finding, Mekonnen et al also reported that married PWDs were more knowledgeable about HIV/AIDS than unmarried [11]. The possible explanation could be that couples may be more concerned about HIV/AIDS and they often seek knowledge about sexual activity. Also, couples have a chance to discuss each other and share knowledge in relation to HIV/AIDS. Although females with disabilities



**Table 5. The respondents' knowledge of STIs in North-shewa zone, Ethiopia, 2019.**

| Variables                                                       | Yes                  | No                       |
|-----------------------------------------------------------------|----------------------|--------------------------|
| Have you ever heard about STIs? (n = 337)                       | 371(93.4)            | 26(6.6)                  |
| <b>What is STIs (n = 371)</b>                                   |                      |                          |
| Illnesses transmitted by sexual intercourse                     | 320(86.2)            | 30(8.1)                  |
| Do not know                                                     | 21(5.7)              |                          |
| <b>Which type of STIs did you know? (n = 371)</b>               |                      |                          |
| Gonorrhoea                                                      | 279(75.2)            | 92(24.8)                 |
| Syphilis                                                        | 265(71.4)            | 106(28.6)                |
| Chancroid                                                       | 216(58.3)            | 155(41.7)                |
| Lymphogranuloma venereum                                        | 182(49.0)            | 189(51.0)                |
| HIV/AIDS                                                        | 234(87.3)            | 47(12.7)                 |
| Do not know                                                     | 17(4.5)              |                          |
| <b>Average knowledge of the type of STIs</b>                    | <b>167(44.9)</b>     |                          |
| <b>Which signs/symptoms of STIs did you know? (n = 371)</b>     |                      |                          |
| Genital ulcer                                                   | 284(76.5)            | 87(23.5)                 |
| Genital discharge                                               | 249(67.1)            | 122(32.8)                |
| Pain during urination                                           | 262(70.6)            | 109(29.4)                |
| Genital swelling                                                | 195(52.5)            | 176(47.5)                |
| Do not know                                                     | 73(19.7)             |                          |
| <b>Average knowledge of signs/symptoms of STIs</b>              | <b>139(37.6)</b>     |                          |
| <b>Which risks of STIs transmission did you know? (n = 371)</b> |                      |                          |
| Unprotected sex                                                 | 328(88.5)            | 43(11.5)                 |
| Inconsistent condom use                                         | 259(69.7)            | 112(30.3)                |
| Having multiple partners                                        | 270(72.8)            | 101(27.2)                |
| Sex work                                                        | 218(58.7)            | 153(41.3)                |
| Pregnancy                                                       | 79(21.3)             | 292(78.7)                |
| Sharing cloths                                                  | 84(22.7)             | 287(77.3)                |
| Do not know                                                     | 13(3.4)              |                          |
| <b>Average knowledge of risks of STIs transmissions</b>         | <b>165(44.5)</b>     |                          |
| <b>Which prevention methods of STIs did you know? (n = 371)</b> |                      |                          |
| Screening and diagnosis of risky individuals                    | 204(54.9)            | 167(45.1)                |
| Treatment of patients & their sexual partners                   | 221(59.6)            | 150(40.4)                |
| Use of condom prevent STIs                                      | 261(70.4)            | 110(29.6)                |
| Do not know                                                     | 32(8.7)              |                          |
| <b>Average knowledge of prevention methods of STIs</b>          | <b>222(59.7)</b>     |                          |
| <b>What are the complications of untreated STIs? (n = 371)</b>  |                      |                          |
| Upper genital tract infections                                  | 208(56.1)            | 163(43.9)                |
| Infertility                                                     | 186(50.2)            | 185(49.8)                |
| Cervical cancer                                                 | 232(62.5)            | 139(37.5)                |
| Enhanced transmission & acquisition of HIV                      | 280(75.5)            | 91(24.5)                 |
| Others (bleeding,)                                              | 41(11.1)             |                          |
| <b>Average knowledge of complication of untreated STIs</b>      | <b>177(47.7)</b>     |                          |
| <b>Overall knowledge of STIs</b>                                | <b>Knowledgeable</b> | <b>Not knowledgeable</b> |
|                                                                 | <b>174(46.9)</b>     | <b>197(53.1)</b>         |

<https://doi.org/10.1371/journal.pone.0241312.t005>

are highly vulnerable to HIV infection and its effects, they are less likely to have HIV/AIDS-related knowledge [19]. This is also confirmed in our report in which male respondents were 1.6 times more knowledgeable about HIV/AIDS than females. This is probably because females with disabilities are often marginalized from community-based awareness activities of

**Table 6. The respondents' attitude towards STIs in North-shewa zone, Ethiopia, 2019.**

| Variables (n = 371)                                                                                  | Agree                | Disagree      | Do not know          |
|------------------------------------------------------------------------------------------------------|----------------------|---------------|----------------------|
| Do you think STIs are not as dangerous as they can be cured?                                         | 104<br>(28.1)        | 201<br>(54.1) | 66(17.8)             |
| Do you think screening for STIs is good?                                                             | 301<br>(81.1)        | 27(7.4)       | 39(10.5)             |
| Do you think a person who is infected with STI must be treated?                                      | 302<br>(81.5)        | 54(14.4)      | 15(4.1)              |
| Do you think isolating a person who is infected with STI can help prevent the spread of the disease? | 100<br>(27.0)        | 235<br>(63.3) | 36(9.6)              |
| Do you think STIs affect the marital relationship?                                                   | 238<br>(64.1)        | 88(23.7)      | 45(12.2)             |
| Do you think a person who is infected with STIs can be cured?                                        | 158<br>(42.6)        | 146<br>(39.3) | 67(18.1)             |
| I do not mind if others know that I am with STIs                                                     | 183<br>(49.3)        | 139<br>(37.4) | 49(13.3)             |
| Do you think STIs patients pay the price for their immoral life?                                     | 83(22.4)             | 178<br>(47.9) | 110(29.7)            |
| <b>Overall STIs attitude level</b>                                                                   | <b>Good attitude</b> |               | <b>Poor attitude</b> |
|                                                                                                      | <b>258(69.6)</b>     |               | <b>113(30.4)</b>     |

<https://doi.org/10.1371/journal.pone.0241312.t006>

sexual and reproductive health including HIV and other STIs prevention. Besides, females with disabilities have a limited access to sexuality education than males with disabilities [26] and females with disabilities are discouraged from discussing HIV/AIDS and sexual-related issues in the study area due to some cultural influences.

Overall, our study adds to the remarkable body of evidence on knowledge, attitudes and practices of people with disabilities in relation to HIV/AIDS and STIs and has paramount public health importance to deliver appropriate SRH-information to people with disabilities. Our results also help policymakers to tailor suitable SRH-related programs that target the needs of PWDs in this context.

### Limitations of the study

Despite its strengths, this study has some limitations that must be acknowledged. Cross-sectional study design may not show the cause-effect relationship of variables and the results may

**Table 7. Determinants of knowledge about HIV/AIDS and other STIs among respondents in North-shewa zone, Ethiopia, 2019.**

| Variables associated with knowledge of HIV/AIDS    | Not knowledgeable | Knowledgeable | COR(95% CI) | p-value          | AOR(95% CI) | p-value          |       |
|----------------------------------------------------|-------------------|---------------|-------------|------------------|-------------|------------------|-------|
| Sex of the respondents                             | Female            | 101(49.3)     | 68(37.0)    | 1                | 1           |                  |       |
|                                                    | Male              | 104(50.7)     | 116(63.0)   | 1.66(1.21,7.32)  | 0.001       | 1.60(1.21, 9.12) | 0.011 |
| Ever heard about VCT                               | Yes               | 180(87.6)     | 118(64.0)   | 1                | 1           |                  |       |
|                                                    | No                | 25(12.4)      | 66(36.0)    | 4.03(1.10,6.81)  | 0.010       | 3.17(0.89,7.26)  | 0.171 |
| <b>Variables associated with knowledge of STIs</b> |                   |               |             |                  |             |                  |       |
| Age of the respondents                             | 18–30             | 123(62.4)     | 93(53.2)    | 1                | 1           |                  |       |
|                                                    | 31–40             | 40(20.3)      | 42(23.4)    | 1.39(1.13, 9.77) | 0.021       | 1.31(0.92,11.91) | 0.502 |
|                                                    | 41–50             | 34(17.3)      | 39(23.4)    | 1.52(0.87, 5.77) | 0.231       | 1.43(0.41, 6.17) | 0.211 |
| Marital status of the respondents                  | Single            | 82(41.6)      | 41(23.6)    | 1                | 1           |                  |       |
|                                                    | Married           | 76(38.6)      | 92(52.9)    | 2.42(1.81,9.11)  | 0.006       | 2.23(1.92,10.72) | 0.007 |
|                                                    | Divorced/widowed  | 39(19.8)      | 41(23.5)    | 2.10(0.86,22.51) | 0.171       | 2.21(0.86,23.17) | 0.140 |

<https://doi.org/10.1371/journal.pone.0241312.t007>

be less reliable. Exploratory factor analysis was not conducted on the questionnaire. Furthermore, the study focused on disability-support organizations that may miss some PWDs in the community. The authors also acknowledge the possibility of information bias created by the sign language interpreters to interpret for respondents who had a hearing loss.

## Conclusions

In this study, knowledge, attitudes, and practices of people with disabilities in relation to HIV/AIDS and other STIs were relatively low. This is clear evidence that HIV programs need to ensure that people with disabilities can access basic knowledge about HIV/AIDS and STIs.

## Supporting information

**S1 File. English and Amharic language version of the questionnaire and consent form, 2019.**  
(PDF)

## Acknowledgments

We are grateful to Debre Berhan zone social affairs department for providing us with disability-related data. We would also like to acknowledge our study participants, data collectors, and district social experts who kindly participated in this study.

## Author Contributions

**Conceptualization:** Alemayehu Gonie Mekonnen, Alebachew Demelash Bayleyegn, Yared Asmare Aynalem, Mikyas Arega Muluneh, Abayneh Birlie Zeru.

**Data curation:** Alemayehu Gonie Mekonnen, Yared Asmare Aynalem, Tigist Demssew Adane, Mikyas Arega Muluneh, Abayneh Birlie Zeru.

**Formal analysis:** Alemayehu Gonie Mekonnen, Mikyas Arega Muluneh.

**Funding acquisition:** Alemayehu Gonie Mekonnen, Alebachew Demelash Bayleyegn, Yared Asmare Aynalem, Abayneh Birlie Zeru.

**Investigation:** Alemayehu Gonie Mekonnen, Alebachew Demelash Bayleyegn, Tigist Demssew Adane, Mikyas Arega Muluneh, Abayneh Birlie Zeru.

**Methodology:** Alemayehu Gonie Mekonnen, Alebachew Demelash Bayleyegn, Yared Asmare Aynalem, Mikyas Arega Muluneh, Abayneh Birlie Zeru.

**Project administration:** Alemayehu Gonie Mekonnen, Alebachew Demelash Bayleyegn.

**Resources:** Alemayehu Gonie Mekonnen, Yared Asmare Aynalem, Tigist Demssew Adane, Abayneh Birlie Zeru.

**Software:** Alemayehu Gonie Mekonnen, Yared Asmare Aynalem, Tigist Demssew Adane.

**Supervision:** Alemayehu Gonie Mekonnen, Alebachew Demelash Bayleyegn, Yared Asmare Aynalem, Mikyas Arega Muluneh.

**Validation:** Alemayehu Gonie Mekonnen, Alebachew Demelash Bayleyegn, Yared Asmare Aynalem, Mikyas Arega Muluneh.

**Visualization:** Alemayehu Gonie Mekonnen.

**Writing – original draft:** Alemayehu Gonie Mekonnen, Alebachew Demelash Bayleyegn.

**Writing – review & editing:** Alemayehu Gomie Mekonnen, Tigist Demssew Adane, Abayneh Birlie Zeru.

## References

1. Officer A, Shakespeare T. The world report on disability and people with intellectual disabilities. *Journal of Policy and Practice in Intellectual Disabilities*. 2013; 10(2):86–8.
2. World Health Organization. World report on disability 2011. World Health Organization; 2011. [https://apps.who.int/iris/bitstream/handle/10665/44575/9789240685215\\_eng.pdf](https://apps.who.int/iris/bitstream/handle/10665/44575/9789240685215_eng.pdf).
3. DeBeaudrap P, Mouté C, Pasquier E, Mac-Seing M, Mukangwiye PU, Beninguisse G. Disability and access to Sexual and Reproductive Health services in Cameroon: A mediation analysis of the role of socioeconomic factors. *International journal of environmental research and public health*. 2019; 16(3):417.
4. Kassa TA, Luck T, Bekele A, Riedel-Heller SG. Sexual and reproductive health of young people with disability in Ethiopia: a study on knowledge, attitude and practice: a cross-sectional study. *Globalization and health*. 2016; 12(1):5.
5. De Beaudrap P, Pasquier E, Tchoumkeu A, Touko A, Essomba F, Brus A et al. HandiVIH-A population-based survey to understand the vulnerability of people with disabilities to HIV and other sexual and reproductive health problems in Cameroon: protocol and methodological considerations. *BMJ Open*. 2016 Feb 1; 6(2):e008934. <https://doi.org/10.1136/bmjopen-2015-008934> PMID: 26846895
6. Parsons JA, Bond VA, Nixon SA. Are we not human? Stories of stigma, disability and HIV from Lusaka, Zambia and their implications for access to health services. *PLoS One*. 2015; 10(6).
7. UNAIDS. UNAIDS strategy for integrating disability into AIDS programmes. 2012.
8. Groce NE, Rohleder P, Eide AH, MacLachlan M, Mall S, Swartz L. HIV issues and people with disabilities: a review and agenda for research. *Social Science & Medicine*. 2013; 77:31–40.
9. Schenk KD, Tun W, Sheehy M, Okal J, Kuffour E, Moono G, et al. “Even the fowl has feelings”: access to HIV information and services among persons with disabilities in Ghana, Uganda, and Zambia. *Disability and Rehabilitation*. 2018; 29:1–4.
10. Baart J, Taaka F. Barriers to healthcare services for people with disabilities in developing countries: a literature review. *Disability, CBR and Inclusive Development*. 2017; 28(4):26–40.
11. Mekonnen M, Behailu T, Wakgari N. Knowledge, attitude, and practice regarding hiv/aids among people with disability in Hawassa City, Southern Ethiopia. *Advances in Public Health*. 2018; 2018. <https://doi.org/10.1155/2018/1893562> PMID: 31236422
12. Araújo AK, de França IS, Coura AS, dos Santos SR, Ramos AP, Pagliuca LM. Sociodemographic profile of blind people: associations with knowledge, attitude and practice about sexually transmitted infections. *Rev Rene*. 2015; 16(5):738–45.
13. Yousafzai AK, Dlamini PJ, Groce N, Wirz S. Knowledge, personal risk and experiences of HIV/AIDS among PWDs in Swaziland. *International Journal of rehabilitation research*. 2004; 27(3):247–51. <https://doi.org/10.1097/00004356-200409000-00012> PMID: 15319697
14. Kibret et al. Trends and spatial distributions of HIV prevalence in Ethiopia. *Infectious Diseases of Poverty* (2019) 8:90. <https://doi.org/10.1186/s40249-019-0594-9> PMID: 31623689
15. Hanass-Hancock J, Alli F. Closing the gap: training for healthcare workers and PWDs on the interrelationship of HIV and disability. *Disability and Rehabilitation*. 2015; 37(21):2012–21. <https://doi.org/10.3109/09638288.2014.991455> PMID: 25524557
16. Ngilangwa DP, Rajesh S, Kawala M, Mbeba R, Sambili B, Mkuwa S et al. Accessibility to sexual and reproductive health and rights education among marginalized youth in selected districts of Tanzania. *The Pan African Medical Journal*. The Pan African Medical Journal. 2016; 25(2):1–7.
17. Obasi M, Manortey S, Kyei KA, Addo MK, Talboys S, Gay L, et al. Sexual and reproductive health of adolescents in schools for people with disabilities. *The Pan African medical journal*. 2019; 33:299. <https://doi.org/10.11604/pamj.2019.33.299.18546> PMID: 31692876
18. Central Statistical Agency (CSA) [Ethiopia] and ICF. 2016. Ethiopia Demographic and Health Survey 2016. Addis Ababa, Ethiopia, and Rockville, Maryland, USA: CSA and ICF.
19. Oljira L, Berhane Y, Worku A. Assessment of comprehensive HIV/AIDS knowledge level among in-school adolescents in eastern Ethiopia. *Journal of the International AIDS Society*. 2013; 16(1):17349.
20. Alemu T, Fantahun M. Sexual and reproductive health status and related problems of young people with disabilities in selected associations of people with disability, Addis Ababa, Ethiopia. *Ethiopian medical journal*. 2011; 49(2):97–108. PMID: 21796909

21. Gemeda TT, Gandile AU, Bikamo DS. HIV/AIDS knowledge, attitude and practice among Dilla University Students, Ethiopia. *African journal of reproductive health*. 2017; 21(3):49–61. <https://doi.org/10.29063/ajrh2017/v21i3.4> PMID: 29624928
22. Abdul R, Gerritsen AA, Mwangome M, Geubbels E. Prevalence of self-reported symptoms of sexually transmitted infections, knowledge and sexual behaviour among youth in semi-rural Tanzania in the period of adolescent-friendly health services strategy implementation. *BMC Infectious Diseases*. 2018; 18(1):229. <https://doi.org/10.1186/s12879-018-3138-1> PMID: 29778101
23. Nixon SA, Cameron C, Hanass-Hancock J, Simwaba P, Solomon PE, Bond VA, et al. Perceptions of HIV-related health services in Zambia for PWDs who are HIV-positive. *Journal of the International AIDS Society*. 2014; 17(1):18806.
24. Abimanyi-Ochom J, Mannan H, Groce NE, McVeigh J. HIV/AIDS knowledge, attitudes and behaviour of persons with and without disabilities from the Uganda Demographic and Health Survey 2011: Differential access to HIV/AIDS information and services. *PloS one*. 2017; 12(4).
25. Tun W, Okal J, Schenk K, Esantsi S, Mutale F, Kyeremaa RK, et al. Limited accessibility to HIV services for persons with disabilities living with HIV in Ghana, Uganda and Zambia. *Journal of the International AIDS Society*. 2016; 19(4):20829.
26. Frohmader C, Ortoleva S. The sexual and reproductive rights of women and girls with disabilities. In: *INICPD International Conference on Population and Development Beyond 2014 Jul 1*. [https://papers.ssrn.com/sol3/papers.cfm?abstract\\_id=2444170](https://papers.ssrn.com/sol3/papers.cfm?abstract_id=2444170).
